# Supplementary material for: Concentrations of PCDD/Fs in Human Blood: A Review of Data from the Current Decade
Source: Preprints.org preprint supplement (doi:10.20944/preprints201908.0199.v1), 2019-08-20
Supplement: Supplementary file 1 [file supplementary]

## DATA

PubMed (<https://www.ncbi.nlm.nih.gov/pubmed>) and Scopus (<https://www.scopus.com/search/>) were used as databases, with the search terms “dioxins, human exposure, blood” and “PCDDs, PCDFs, human blood”. Moreover, a complementary search was carried out by using the search terms: “dioxins, blood, *various specific countries (China, USA, Germany, UK, etc.....)*” in order not to lose any relevant information. Publications from regulatory organizations and other authorities, as well as gray literature available through the Internet, were intentionally excluded. This paper has been focused only on scientific publications. The period of the Review covered between January 1, 2010 and August 7, 2019. Although only scientific publications within this period were included, some of the revised data may be referred to studies on dioxins in blood samples collected or analyzed in previous years.
